# Supplementary material for: Extensive mobilome dynamics in a widespread endosymbiont: long read metagenomics reveal dimeric plasmids and highly fragmented prophages in Wolbachia from Culex pipiens
Source: Research Square preprint supplement (doi:10.21203/rs.3.rs-8855126/v1), 2026-02-18
Supplement: Supplementary file 1 [file 236ade72ac272d3de860e5de.xlsx]

## Sheet: Feuil1
Sample	Sample DNA concentration (ng/µL)	Volume of sample (µL)	Quantity of lambda phage (DNA added (ng)	Total starting DNA amount (ng)	Gravid
Cel_grav	11.1	46	1000	1511	Yes
				(33% sample)
