# Supplementary material for: Extensive mobilome dynamics in a widespread endosymbiont: long read metagenomics reveal dimeric plasmids and highly fragmented prophages in Wolbachia from Culex pipiens
Source: Research Square preprint supplement (doi:10.21203/rs.3.rs-8855126/v1), 2026-02-18
Supplement: Supplementary file 2 [file 564f8d6b730e1e5b16a15836.xlsx]

## Sheet: Feuil1
				After_quality_filter (MapQ>2)
name_contigs	length(pb)	BLAST_identification	Coverage_qc_of_splits	Number_of_reads	Longest_read	Mean_read_length	N50_reads	blast_alignement	detection
contig_1	3109	WOPip1	19.3	66	23664	3861.2	7729		0.51
contig_2	1186930	Core genome	39;25;35;30;24;27;23	16462	62024	2269.8	3996		1
contig_3	112962	WOPip4+WOPip3+?	52.2;58.3;34.6;31.6;30.5	2039	69717	2483	4655		1
contig_5	731	WOPip4	0					Contig_7	1
contig_6	1288	WOPip5	55.6	96	14618	2879.3	4072		1
contig_7	12018	Phage tails	118.9	777	69717	2675.8	5706		1
contig_8	1385	Transposase IS110	0					Contig_9	0
contig_9	18485	Plasmid	32.75	130	22496	4770.5	7575		1
contig_10	41477	WOPip2+WOPip1	95.6; 33.8	1115	34259	2914.6	5572		1
contig_13	7964	WOPip1	76.9	348	34259	3113.6	6330		1
contig_14	29058	WOPip2+WOPip1	54.7	626	37638	3774.9	6829		1
contig_15	5040	WOPip1	55.99	190	27197	3073.7	5799		1
contig_16	5025	WOPip2	1.55	11	15308	4592.4	13430		0.76
contig_17	4007	WOPip5	1.06	5	2319	1375.4	2197		0.69
contig_18	2540	WOPip4	0						0
contig_19	2788	WOPip3	0	15	2096	1011.1	1145		0
contig_20	1274	WOPip5	0						0
contig_21	2534	WOPip5	2.56	4	2404	1708.5	1612		0.98
contig_22	38879	WOPip5	72.43	1222	40052	2700.7	4840		1
contig_23	17160	WOPip2	17	60	27197	6687.6	13711		0.92
contig_24	10766	WOPip4	73.2	394	31941	3052	5754		1
contig_26	1989	WOPip1	0						0
contig_27	1953	WOPip3	14.9	39	9243	2398.1	3625		1
contig_38	5948	WOPip4	59.1	225	32513	3186.3	6296		1
				Before_quality_filter (MapQ=0)
name_contigs	Length(pb)	BLAST_identification	Coverage_contig	Number_of_reads	Longest_read	Mean_read_length	N50_reads
contig_1	3109	WOPip1	21.01	155	18706	3140.1	6485
contig_2	1186930	Core genome	25-33	16659	45219	2131	3833
contig_3	112962	WOPip4+WOPip3+?	60,2/32,49	3080	69717	1963.2	3785
contig_5	731	WOPip4	0.47	9	1204	436.2	428
contig_6	1288	WOPip5	55.6	96	20083	2968.8	96
contig_7	12018	Phage tails	120.76	878	69717	2393.7	4157
contig_8	1385	Transposase IS110	6.41	185	40052	2540.9	5791
contig_9	18485	Plasmid	82.85	893	40052	2180.6	3813
contig_10	41477	WOPip2+WOPip1	98,47/35,82	1436	34259	2393.7	5086
contig_13	7964	WOPip1	79.64	514	34259	3045	6519
contig_14	29058	WOPip2+WOPip1	70.57	1893	37638	2204.9	4144
contig_15	5040	WOPip1	56.02	183	27197	3025.5	5799
contig_16	5025	WOPip2	9.01	122	15308	1437.1	2512
contig_17	4007	WOPip5	15.64	250	4865	1087.3	1601
contig_18	2540	WOPip4	5.64	57	2783	777.6	1110
contig_19	2788	WOPip3	10.16	1149	3177	841.5	1149
contig_20	1274	WOPip5	0.07	14	1584	492.4	535
contig_21	2534	WOPip5	6.86	80	3135	793.7	1258
contig_22	38879	WOPip5	76.66	2000	40052	2041.8	3772
contig_23	17160	WOPip2	46.04	1263	37638	2085.3	3876
contig_24	10766	WOPip4	75.39	456	31941	2806.3	5068
contig_26	1989	WOPip1	4.31	63	13637	1099.9	1559
contig_27	1953	WOPip3	14.91	37	9243	2481.2	3763
contig_38	5948	WOPip4	59.61	225	32513	3062.4	5754
