# Supplementary material for: Extensive mobilome dynamics in a widespread endosymbiont: long read metagenomics reveal dimeric plasmids and highly fragmented prophages in Wolbachia from Culex pipiens
Source: Research Square preprint supplement (doi:10.21203/rs.3.rs-8855126/v1), 2026-02-18
Supplement: Supplementary file 3 [file 99eea43d7c16b30a7761f97b.xlsx]

## Sheet: Feuil1
10 genes unique to CelG	Functionnal annotation (BLAST, COG)
GC_00001149/CelG_26	WP_265035912.1/FtsB family cell division protein [Wolbachia endosymbiont (group A) of Anomoia purmunda]
GC_00001152/CelG_1423:	KLT22149.1/putative minor tail protein Z [Wolbachia endosymbiont of Armadillidium vulgare str. wVulC]
GC_00001162/CelG_1447:	ONI56233.1/hypothetical protein N500_0689 [Wolbachia pipientis wUni]
GC_00001163/CelG_494:	WP_353283466.1/cell division protein FtsL [Wolbachia endosymbiont (group A) of Pogonocherus hispidulus]
GC_00001148/CelG_722:	WP_047759252.1/IS66 family transposase/Initiation-control protein YabA [Wolbachia endosymbiont of Armadillidium vulgare]
GC_00001140/CelG_565:	WP_264687559.1/NADPH-quinone oxidoreductase/complex I subunit 4 family protein [Wolbachia endosymbiont (group B) of Erynnis tages]
GC_00001138/CelG_1275:	WP_007302887.1/tetratricopeptide repeat protein [Wolbachia endosymbiont of Culex quinquefasciatus]
GC_00001136/CelG_1059:	WP_264686126.1/hypothetical protein [Wolbachia endosymbiont (group B) of Polyommatus icarus]
GC_00001133/CelG_1312:	WP_419198680.1/DNA repair protein RadC [Wolbachia endosymbiont of Rhagoletis cingulata]
GC_00001150/CelG_966:	WP_416603728.1/DnaJ domain-containing protein [Wolbachia endosymbiont of Nasonia vitripennis]
8 genes not present in CelG:	Functionnal annotation (BLAST, COG)
GC_00001093/JHB_1383:	WP_007302887.1/tetratricopeptide repeat protein [Wolbachia endosymbiont of Culex quinquefasciatus]
GC_00001092/JHB_1191:	WP_341818054.1/IS630 family transposase [Wolbachia endosymbiont (group A) of Andrena fulva]
GC_00001107/JHB_695:	BFO24113.1/hypothetical protein WBOLY_07500 [Wolbachia pipientis]
GC_00001091/JHB_775:	WP_012481980.1/monovalent cation/H+ antiporter complex subunit F [Wolbachia]
GC_00001112/JHB_1102:	COG0267/Ribosomal protein L33 (RpmG) (PDB:1VS6)
GC_00001120/JHB_921:	BFO23779.1/hypothetical protein WBOLY_04160 [Wolbachia pipientis]
GC_00000049/JHB_115/x3:	WP_353279613.1/WO male-killing family protein Wmk [Wolbachia endosymbiont (group A) of Ennomos erosarius]
GC_00000991/JHB_1417:	WP_265023072.1/head-tail joining protein [Wolbachia endosymbiont (group B) of Ischnura elegans]
