# Supplementary material for: Extensive mobilome dynamics in a widespread endosymbiont: long read metagenomics reveal dimeric plasmids and highly fragmented prophages in Wolbachia from Culex pipiens
Source: Research Square preprint supplement (doi:10.21203/rs.3.rs-8855126/v1), 2026-02-18
Supplement: Supplementary file 4 [file e8bf9315269ce55055a0b352.xlsx]

## Sheet: Feuil1
						ace2											GP11											GPW											wsp
samples	species	strain	organ	Extraction	qPCR	TM			CP			CP_mean	Concentration			Concentration_mean	TM			CP			CP_mean	Concentration1	Concentration2	Concentration3	Concentration_mean	TM			CP			CP_mean	Concentration			Concentration_mean	TM			CP			CP_mean	Concentration			Concentration_mean
ov_grav1	Culex pipiens molestus	celestine	Ovaries	18022025	18022025	86.99	87.1	87.11	21.79	21.71	23.41	22.3033	2.96e-05	3.11e-05	1.03e-05	2.36667e-05	83.44	83.38	83.5	15.39	15.59	15.49	15.49	0.00162	0.00142	0.00152	0.00152	80.49	80.58	80.5	13.17	13.08	12.94	13.0633	0.0105	0.0113	0.0124	0.0114	80.78	80.6	80.84	16.64	16.18	16.18	16.3333	0.000947	0.00129	0.0013	0.001179
ov_grav2	Culex pipiens molestus	celestine	Ovaries	18022025	18022025	87.28	87	78,73/87,22	21.69	21.79	20.91	21.4633	3.16e-05	2.97e-05	5.27e-05	3.8e-05	83.37	83.31	83.4	14.52	15.11	14.28	14.6367	0.00287	0.00194	0.00337	0.00272667	80.39	80.48	80.47	12.46	13.26	12.48	12.7333	0.0174	0.00993	0.0172	0.0148433	80.61	80.76	80.65	15.75	15.87	15.82	15.8133	0.00174	0.00159	0.00166	0.00166333
ov_grav3	Culex pipiens molestus	celestine	Ovaries	18022025	18022025	86.79	86.88	86.85	21.97	21.48	21.58	21.6767	2.62e-05	3.63e-05	3.41e-05	3.22e-05	83.29	83.36	83.12	14.73	14.8	14.74	14.7567	0.00249	0.00239	0.00248	0.00245333	80.4	80.41	80.44	12.94	12.62	12.57	12.71	0.0124	0.0155	0.0161	0.0146667	80.58	80.65	80.54	16.26	16.09	15.95	16.1	0.00123	0.00137	0.00152	0.00137333
ov_grav4	Culex pipiens molestus	celestine	Ovaries	18022025	18022025	86.86	79,18/86,93	86.96	21.03	21.05	21.33	21.1367	4.87e-05	4.79e-05	3.99e-05	4.55e-05	83.31	83.31	83.18	14.34	14.4	14.33	14.3567	0.00322	0.00311	0.00324	0.00319	80.42	80.5	80.4	12.63	12.84	12.74	12.7367	0.0154	0.0133	0.0143	0.0143333	80.53	80.7	80.64	15.93	16.45	16.01	16.13	0.00154	0.00108	0.00146	0.00136
ov_grav5	Culex pipiens molestus	celestine	Ovaries	18022025	18022025	87.01	87.26	79,12/87,19	21.51	22.36	21.34	21.7367	3.56e-05	2.04e-05	3.98e-05	3.19333e-05	83.41	83.45	83.46	15.7	14.75	14.7	15.05	0.00132	0.00247	0.00254	0.00211	80.6	80.74	80.63	12.95	13.12	12.78	12.95	0.0123	0.011	0.0139	0.0124	80.63	80.73	80.76	15.98	16.01	15.7	15.8967	0.00148	0.00145	0.0018	0.00157667
[truncated: 3 more columns]
